# Supplementary material
Source: PubMed Central journal article supplement (PMC3659950)
Supplement: supp_2012.072835_2012.072835.WEINKOVE_SUPPL.pdf [file supp_2012.072835_2012.072835.WEINKOVE_SUPPL.pdf]

# Functional invariant natural killer T-cell and CD1d axis in chronic lymphocytic leukemia: implications for immunotherapy

Robert Weinkove,<sup>1,2,3</sup> Collin R. Brooks,<sup>1,4</sup> John M. Carter,<sup>2,3</sup> Ian F. Hermans,<sup>1,5</sup> and Franca Ronchese<sup>1</sup>

<sup>1</sup>Malaghan Institute of Medical Research, Wellington, New Zealand; <sup>2</sup>Wellington School of Medicine, University of Otago, Wellington, New Zealand; <sup>3</sup>Capital & Coast District Health Board, Wellington, New Zealand; <sup>4</sup>Centre for Public Health Research, Massey University, Wellington, New Zealand, and <sup>5</sup>School of Biological Sciences, Victoria University of Wellington, Wellington, New Zealand

©2013 Ferrata Storti Foundation. This is an open-access paper. doi:10.3324/haematol.2012.072835

## Online Supplementary Design and Methods

### Isolation and storage of peripheral blood mononuclear cells

Eighty milliliters of peripheral blood were collected into heparinized tubes, and diluted 1:1 in Dulbecco's phosphate-buffered saline (PBS). The peripheral blood mononuclear cell (PBMC) fraction was separated by density-centrifugation (using Lymphoprep; Axis-Shield, Oslo, Norway) according to the manufacturer's instructions. PBMC were aspirated, washed and resuspended in 90% fetal calf serum (SAFC Biosciences, Lenexa, KS, USA) with 10% dimethylsulfoxide (Sigma-Aldrich, St Louis, MO, USA) and placed in a controlled-rate freezing container for cryopreservation at -180°C in gaseous phase liquid nitrogen until use.

### B-cell enrichment and depletion

B cells were positively selected and depleted using anti-CD19-coated immunomagnetic beads (Dynabeads CD19 pan-B; Invitrogen Dynal AS, Oslo, Norway) to achieve a residual level of chronic lymphocytic leukemia (CLL) cells of <5% in B-cell-depleted PBMC (confirmed by flow cytometry). Immunomagnetic beads were subsequently detached using anti-Fab antibodies specific for the bead-bound anti-CD19 antibody (DETACHaBEAD CD19; Invitrogen Dynal AS). For some experiments, CLL cells were sorted by fluorescence-activated cell sorting (FACS) based on CD5/CD19 co-expression on a BD FACSVantage DiVa (Becton Dickinson, San Jose, CA, USA), to ≥98.5% purity.

### Flow cytometric analysis

Fc receptors were blocked with 2 mg/mL polyclonal human IgG (Intragam P, CSL Limited, Broadmeadows, Australia). For surface staining, cells were incubated for 20 min at 4°C with the

fluorescent antibodies indicated at predetermined optimal concentrations. Cells were stained with a viability dye [LIVE/DEAD Fixable Blue; Molecular Probes, Eugene, OR, USA] or 4',6-diamidino-2-phenylindole (DAPI; Molecular Probes) to allow exclusion of dead cells. Data were acquired on an LSRII flow cytometer (Becton Dickinson) and analyzed using FlowJo software (Tree Star Incorporated, Ashland, OR, USA). Automated compensation was performed using the appropriate fluorophore-labeled antibodies bound to anti-mouse Ig coated particles (BD Compbeads; BD Biosciences, Franklin Lakes, NJ, USA) or stained/unstained cell populations as required.

The fluorescent antibodies used were: CD25 FITC, CD161 FITC, Lin1 FITC, IFN-γ FITC, granzyme B FITC, HLA Class I FITC, anti-iNKT cell PE (clone 6B11; specific for Vα24Jα18 TCRA chain), CD1d PE (clone CD1d42), CD14 PE, CD19 PE, CD86 PE, CD80 PE, HLA-DR PerCP, CD5 APC, CD11c APC, CD14 APC, CD19 APC, CD3 APC-H7 from BD Biosciences (Franklin Lakes, NJ, USA); CD1c PE, CD4 Pacific Blue, IL-4 APC, CD8 Alexa Fluor 700, ZAP-70 PE from Biolegend (San Diego, CA, USA); CD23 FITC from Beckman Coulter (Brea, CA, USA).

### Intracellular cytokine staining

PBMC were resuspended to 1×10<sup>6</sup>/mL in Iscove's modified Dulbecco's medium (Invitrogen, Auckland, New Zealand) with 5% human AB serum (Invitrogen) (cIMDM). Ionomycin 1 μg/mL (Merck, Manukau City, New Zealand), phorbol 12-myristate 13-acetate 10 ng/mL (PMA; Sigma-Aldrich, Auckland, New Zealand) and brefeldin A (eBioscience, San Diego, CA, USA) 2 μg/mL were added, and cells incubated at 37°C for 4 h before washing, blocking and surface staining. Cells were fixed, permeabilized, stained and washed using a fixation/permeabilization kit (BD Cytofix/Cytoperm; BD Biosciences) before flow cytometric analysis.

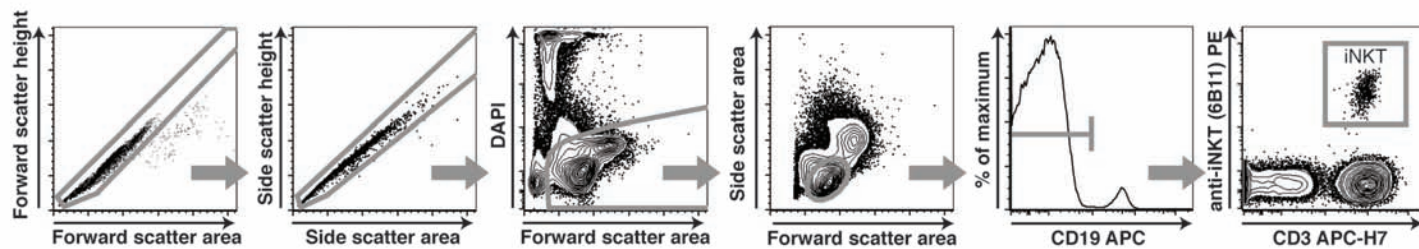

Online Supplementary Figure S1. Serial flow cytometric gating strategy used to identify iNKT cells.

Online Supplementary Table S1. Characteristics of healthy controls compared to untreated and treated patients

|                                                                 | Controls            | Untreated CLL       | Treated CLL         | P     |
|-----------------------------------------------------------------|---------------------|---------------------|---------------------|-------|
| Study participants, n.                                          | 30                  | 30                  | 10                  | -     |
| Male, n. (%)                                                    | 12 (40%)            | 14 (47%)            | 7 (70%)             | 0.26  |
| Age, median (range), years                                      | 64 (43-86)          | 63 (47-86)          | 62 (47-79)          | 0.75  |
| iNKT cell frequency, median (range), % of T cells               | 0.022 (0.004-0.302) | 0.010 (0.001-0.113) | 0.011 (0.001-0.031) | 0.08  |
| iNKT cell absolute number, median (range), per mL blood         | 195.3 (33.9-1324)   | 329 (17.7-3082)     | 66.1 (14.3-1108)    | <0.01 |
| mDC absolute number, median (range), x10 <sup>6</sup> /mL blood | 10.7 (2.5-40.8)     | 9.4 (0.4-47.9)      | 3.0 (0.1-11.2)      | <0.01 |

Online Supplementary Table S2. Characteristics of patients with CLL.

| Patient | Age (years) | Sex | Time from diagnosis to phlebotomy (months) | Binet (Rai) stage | ZAP-70 status | Prior treatment | Time since last treatment (months) | iNKT cells (% of T cells) | iNKT cells (absolute number per mL blood) | mDC ( $\times 10^3$ /mL blood) |
|---------|-------------|-----|--------------------------------------------|-------------------|---------------|-----------------|------------------------------------|---------------------------|-------------------------------------------|--------------------------------|
| D008    | 62          | F   | 15                                         | A(I)              | Negative      | None            | -                                  | 0.092                     | 3081.6                                    | 29.34                          |
| D012    | 71          | M   | 18                                         | B(II)             | Negative      | None            | -                                  | 0.008                     | 213.2                                     | 27.13                          |
| D015    | 56          | M   | 7                                          | A(I)              | Positive      | None            | -                                  | 0.010                     | 322.9                                     | 6.32                           |
| D017    | 61          | F   | 48                                         | A(0)              | Negative      | None            | -                                  | 0.010                     | 586.5                                     | 41.67                          |
| D020    | 47          | M   | 21                                         | A(I)              | Positive      | None            | -                                  | 0.052                     | 1118.9                                    | 33.76                          |
| D022    | 61          | M   | 87                                         | B(II)             | Negative      | None            | -                                  | 0.051                     | 2452.1                                    | 47.88                          |
| D025    | 62          | M   | 88                                         | A(0)              | Negative      | None            | -                                  | 0.010                     | 335.0                                     | 19.79                          |
| D026    | 54          | F   | 77                                         | A(0)              | Negative      | None            | -                                  | 0.036                     | 417.2                                     | 0.42                           |
| D028    | 86          | M   | 16                                         | C(IV)             | Positive      | None            | -                                  | 0.007                     | 243.9                                     | 5.24                           |
| D029    | 71          | M   | 1                                          | B(I)              | Positive      | None            | -                                  | 0.030                     | 344.4                                     | 11.49                          |
| D030    | 68          | M   | 69                                         | A(0)              | Negative      | None            | -                                  | 0.005                     | 88.1                                      | 8.47                           |
| D034    | 70          | F   | 71                                         | A(0)              | Negative      | None            | -                                  | 0.010                     | 202.4                                     | 18.10                          |
| D036    | 51          | M   | 14                                         | B(II)             | Positive      | None            | -                                  | 0.015                     | 576.5                                     | 4.82                           |
| D037    | 60          | M   | 19                                         | A(0)              | Negative      | None            | -                                  | 0.028                     | 990.2                                     | 8.95                           |
| D038    | 61          | M   | 116                                        | A(0)              | Negative      | None            | -                                  | 0.004                     | 187.7                                     | 13.95                          |
| D039    | 79          | F   | 9                                          | A(0)              | Negative      | None            | -                                  | 0.007                     | 245.0                                     | 3.69                           |
| D041    | 69          | F   | 20                                         | A(0)              | Negative      | None            | -                                  | 0.006                     | 132.4                                     | 17.72                          |
| D046    | 55          | F   | 20                                         | A(0)              | Negative      | None            | -                                  | 0.031                     | 1072.6                                    | 23.83                          |
| D049    | 66          | M   | 159                                        | A(I)              | Negative      | None            | -                                  | 0.029                     | 594.6                                     | 5.95                           |
| D052    | 76          | F   | 122                                        | A(0)              | Negative      | None            | -                                  | 0.001                     | 17.7                                      | 0.66                           |
| D054    | 48          | F   | 28                                         | A(0)              | Negative      | None            | -                                  | 0.012                     | 296.3                                     | 4.57                           |
| D055    | 78          | F   | 61                                         | A(I)              | Positive      | None            | -                                  | 0.006                     | 154.7                                     | 6.52                           |
| D058    | 65          | F   | 53                                         | A(I)              | Negative      | None            | -                                  | 0.010                     | 262.7                                     | 13.25                          |
| D059    | 71          | M   | 46                                         | A(0)              | Negative      | None            | -                                  | 0.005                     | 97.4                                      | 47.86                          |
| D060    | 67          | F   | 137                                        | A(0)              | Negative      | None            | -                                  | 0.023                     | 527.1                                     | 9.01                           |
| D061    | 51          | F   | 52                                         | A(0)              | Negative      | None            | -                                  | 0.024                     | 1616.0                                    | 18.19                          |
| D063    | 50          | M   | 62                                         | A(I)              | Positive      | None            | -                                  | 0.007                     | 87.5                                      | 9.32                           |
| D067    | 56          | F   | 139                                        | A(0)              | Negative      | None            | -                                  | 0.040                     | 1575.3                                    | 6.27                           |
| D069    | 86          | F   | 256                                        | A(0)              | Negative      | None            | -                                  | 0.005                     | 97.7                                      | 9.56                           |
| D071    | 64          | F   | 60                                         | A(0)              | Positive      | None            | -                                  | 0.113                     | 2939.7                                    | 4.40                           |
| D072    | 62          | M   | 100                                        | A(I)              | Negative      | FCR             | 4                                  | 0.023                     | 77.2                                      | 2.76                           |
| D073    | 52          | M   | 139                                        | A(0)              | Positive      | Chl, FC         | 22                                 | 0.005                     | 86.7                                      | 10.09                          |
| D074    | 47          | M   | 61                                         | A(0)              | Negative      | FC, FCR         | 25                                 | 0.018                     | 180.4                                     | 6.87                           |
| D075    | 63          | M   | 188                                        | C(IV)             | Negative      | Chl, FC         | 67                                 | 0.005                     | 53.0                                      | 0.13                           |
| D076    | 72          | M   | 142                                        | C(IV)             | Negative      | Chl, F, FC      | 32                                 | 0.001                     | 14.3                                      | 3.02                           |
| D077    | 61          | M   | 153                                        | A(0)              | Negative      | Chl             | 88                                 | 0.042                     | 1107.8                                    | 6.58                           |
| D079    | 57          | M   | 108                                        | A(I)              | Negative      | CHOP, FC        | 13                                 | 0.004                     | 18.6                                      | 1.61                           |
| D082    | 79          | F   | 130                                        | C(IV)             | Negative      | Chl, F          | 3                                  | 0.030                     | 49.3                                      | 11.18                          |
| D084    | 54          | F   | 64                                         | A(I)              | Negative      | F               | 49                                 | 0.031                     | 184.4                                     | 1.82                           |
| D085    | 68          | F   | 302                                        | A(0)              | Negative      | Chl, F, FC      | 17                                 | 0.011                     | 55.0                                      | 3.46                           |

FCR: fludarabine, cyclophosphamide and rituximab; Chl: chlorambucil; F: fludarabine; FC: fludarabine and cyclophosphamide; CHOP: cyclophosphamide, doxorubicin, vincristine and prednisone; mDC: myeloid dendritic cells.
