# Supplementary material
Source: PubMed Central journal article supplement (PMC3659950)
Supplement: supp_2012.072835_2012_072835-Contributions.pdf [file supp_2012.072835_2012_072835-Contributions.pdf]

**Manuscript no. HAEMATOL/2012/072835 entitled “Functional invariant natural killer T cell and CD1d axis in chronic lymphocytic leukaemia: implications for immunotherapy”**

**Authors: Robert Weinkove, Collin Brooks, John Carter, Ian Hermans, Franca Ronchese**

**Information about the contributions of each person named as having participated in the study**

**1) Guarantor(s), i.e., person(s) who is (are) responsible for the integrity of the work as a whole:**

- Robert Weinkove, Malaghan Institute of Medical Research, PO Box 7060, Wellington, New Zealand, rweinkove@malaghan.org.nz

According to the International Committee of Medical Journal Editors (ICMJE) ([http://www.icmje.org/ethical\\_1author.html](http://www.icmje.org/ethical_1author.html)): “Authorship credit should be based on: 1) substantial contributions to conception and design, acquisition of data, or analysis and interpretation of data; 2) drafting the article or revising it critically for important intellectual content; and 3) final approval of the version to be published. Authors should meet conditions 1, 2, and 3 ..... Acquisition of funding, collection of data, or general supervision of the research group alone does not constitute authorship”.

**The guarantors of this manuscript confirm that all persons designated as authors qualify for authorship, and that each author has participated sufficiently in the work to take public responsibility for appropriate portions of the content.**

**2) Authors who participated in the conception of the study:** Robert Weinkove, John Carter, Ian Hermans, Franca Ronchese

**3) Design & Methods. The following authors were responsible for specific investigations:**

- Robert Weinkove was responsible for ethics application, recruitment and consent of donors, flow cytometric assays, cell culture assays, ELISpot assays, proliferation assays and cytokine measurement
- Collin Brooks was responsible for validation of the flow cytometric assay for iNKT cells
- John Carter was responsible for ethics application and recruitment of donors
- Robert Weinkove, Ian Hermans and Franca Ronchese were responsible for analysis and interpretation of data

**4) Results. The following authors were responsible for specific portions of the results, including figures and tables:**

- Robert Weinkove and Collin Brooks were responsible for online supplementary figure S1
- Robert Weinkove and John Carter were responsible for online supplementary tables S1 and S2
- Robert Weinkove was responsible for figures 1 to 5

**5) Writing the manuscript. The following authors were responsible for writing the manuscript:**

- Robert Weinkove, Collin Brooks, Ian Hermans and Franca Ronchese were responsible for writing the manuscript

**6) Contributors Listed in Acknowledgments:** Gavin Painter of Industrial Research Laboratories for provision of alpha galactosylceramide, Professor Vincenzo Cerundolo of Weatherall Institute of Molecular Medicine for provision of a CD1d-expressing cell line, Evelyn Hyde of Malaghan Institute of Medical Research for technical laboratory assistance, Kylie Price and Brigitta Mester of the Malaghan Institute of Medical Research for technical flow cytometry assistance.
